# Supplementary material for: Exploring Aromatic S-Thioformates as Photoinitiators
Source: MDPI journal article supplement (doi:10.3390/polym15071647), 2023-03-26
Supplement: s1 [file s1]

## Exploring Aromatic S-Thioformates as Photoinitiators

*Paul Rieger<sup>1</sup>, Sabrina Pueschmann<sup>2</sup>, Michael Haas<sup>2</sup>, Max Schmallegger<sup>3</sup>, Georg Gescheidt<sup>3</sup>, Gema Guedes de la Cruz<sup>1\*</sup>, Thomas Griesser<sup>1\*</sup>*

<sup>1</sup>Institute of Chemistry of Polymeric Materials, Montanuniversität Leoben, Otto Glöckelstrasse 2, 8700 Leoben, Austria.

<sup>2</sup> Institute of Inorganic Chemistry, Graz University of Technology, Stremayrgasse 9, 8010 Graz, Austria.

<sup>3</sup> Institute of Physical and Theoretical Chemistry, Graz University of Technology, Stremayrgasse 9, 8010 Graz, Austria.

E-mail: thomas.griesser@unileoben.ac.at;  
gema-del-carmen.guedes-de-la-cruz@unileoben.ac.at

Keywords: photochemistry, photoinitiator, thiol-ene

## SUPPORTING INFORMATION

All manipulations of oxygen- and moisture-sensitive materials were conducted under a nitrogen atmosphere in a flame dried Schlenk flask. <sup>1</sup>H-NMR spectra were recorded on a BRUKER 200 MHz spectrometer using CD<sub>3</sub>CN and DMSO-*d*<sub>6</sub> as deuterated solvents. The <sup>13</sup>C-NMR spectrum was recorded on the same instrument at 50 MHz. Chemical shifts (δ) are expressed in ppm from downfield to upfield. For <sup>1</sup>H-NMR spectra, the multiplicity is indicated as singlet (s) and multiplet (m). For kinetic studies, two different types of NMR tubes were employed depending on the irradiation experiment: (1) a quartz NMR tube for UV irradiation with a monochromatic lamp (254 nm) and (2) a borosilicate glass NMR tube for visible irradiation with a monochromatic lamp (405 nm). The UV-Vis spectra were recorded on a Varian Cary 50 UV-Visible Spectrophotometer in the range of 300-800 nm at a scan rate of 600 nm/min, a data interval of 1.0 nm and an average time of 0.1 s, using a quartz cuvette with an optical path length of 10 mm. The FTIR spectra used to calculate the double bond (DB) conversion were measured using a PerkinElmer Spectrum One FT-IR spectrometer. Proving

the carbon monoxide (CO) formation was conducting by GC-MS, with a Thermo Scientific Trace 1300 Gas Chromatography and Thermo Scientific ISQ 7000 Single Quadrupole Mass Spectrometer, equipped with a fused silica capillary column (Optima-5-Accent-15 m x 0.250 mm x 0.25  $\mu$ m film thickness), an automatic sampler, a split/splitless injector and a mass selective detector. The injector temperature and the GC-MS interface was kept at 250 °C. After injection of 1  $\mu$ L sample, the column was heated from 40 to 260 °C with a heating rate of 12.94 °C/min. The helium carrier gas flow rate was set at 1.3 mL  $\text{m}^{-1}$ . The rheological measurements were performed on a MCR 102e system (Anton Paar). A plate-plate configuration (diameter of 25 mm) was used in oscillating mode with a frequency of 1 Hz and an amplitude ( $\gamma$ ) of 1 %. The printing experiments were conducted using a Photon S 3D printer (Anycubic). Bottom layer exposure was 45 s, exposure of other layers was 30 s with a layer height of 20 microns, and with an average intensity of 2.14 mW  $\text{cm}^{-2}$ . Spin-trapping electron paramagnetic resonance (ST-EPR) was conducted in a Magnettech X-Band EPR spectrometer. 5,5-Dimethyl-1-pyrroline-N-oxide (DMPO) was employed as a trapping reagent and MeCN as solvent. The sample was irradiated with a Hamamatsu LC4 HgXe lamp (365 nm). The HPLC chromatograms were recorded on an Ultimate 3000 UHPLC system (Thermo Fisher) with a C18 reversed-phase analytical column (ACE, 2.1 x 100 mm, particle size 3  $\mu$ m) at 35 °C using a mobile phase A ( $\text{H}_2\text{O}$ ) and B (MeCN) at a flow rate of 0.5 mL  $\text{min}^{-1}$ . The following gradient was applied: linear increase from 30% solution B to 100% solution B in 15 min, hold at 100% solution B for 3 min. Melting point was determined using a microscope and controlled heating plate. All chemicals were obtained from Aldrich Chem. Co, Riedel-de Haën, TCI and Thiocure, and used as received.

## 1. Synthesis of *S*-phenyl thioformate (1b) and *S,S'*-(thiobis(4,1-phenylene))dimethanethioate (2b)

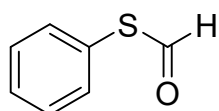

***S*-phenyl thioformate (1b):** the synthesis of this compound was performed according to the literature.<sup>1</sup> A yield of 90% was obtained.

<sup>1</sup>H-NMR (200 MHz,  $\text{CD}_3\text{CN}$ ,  $\delta$ ): 10.24 (s, 1H), 7.52 (m, 5H) ppm.

<sup>1</sup> R. Haraguchi, S.-G. Tanazawa, N. Tokunaga, S.-I. Fukuzawa. Palladium-catalyzed formylation of arylzinc reagents with *S*-phenyl thioformate. *Organic Letters* **2017**, 19, 1646-1649.

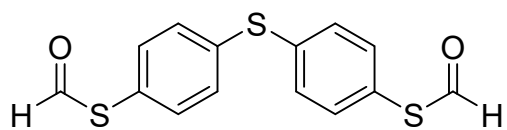

***S,S'*-(thiobis(4,1-phenylene)) dimethanethioate**

**(2b)**: The reaction was performed in a 50 mL Schlenk flask (previously flame-dried under vacuum)

equipped with a magnetic stirring bar. Under N<sub>2</sub> atmosphere, formic acid (3 mL, 80 mmol) and acetic anhydride (3.80 mL, 40 mmol) were added and stirred at 45 °C for 2 h. After cooling at rt and cover the flask with aluminium foil, 4,4'-thiolbisbenzenethiol (2.50 g, 10 mmol) suspended in anhydrous THF (20 mL) and anhydride pyridine (0.03 mL, 0.37 mmol) were added and stirred at 30 °C under N<sub>2</sub> atmosphere for 24h. Subsequently, water was added (100 mL) and the mixture was extracted with EtOAc (2 x 100 mL). The combined organic layers were washed with brine, dried over sodium sulphate, and concentrated in vacuo. After checking the purity of the crude by <sup>1</sup>H-NMR, a second extraction was required; this time extracting only once with EtOAc. The purity of the product was corroborated by <sup>1</sup>H-NMR and HPLC, and *S,S'*-(thiobis(4,1-phenylene)) dimethanethioate was used without further purification. Yield: 91% (2.79 g), white solid, Mp. 70-72 °C, R<sub>f</sub> 0.58 (20% EtOAc-80% cyclohexane).

<sup>1</sup>H-NMR (200 MHz, DMSO-*d*<sub>6</sub>, δ): 10.38 (s, 2H), 7.44-7.59 (m, 8H) ppm; <sup>13</sup>C-NMR (50 MHz, DMSO-*d*<sub>6</sub>, δ): 190.4 (2 SC=O), 136.4 (2 C), 134.9 (2 CH), 131.6 (2 CH), 125.3 (2 C) ppm; FTIR-ATR: ν = 3335.5, 3059.6, 2861.4, 1699.5, 1684.0, 1575.2, 1474.2, 1450.8, 1335.0, 1096.1, 1079.6, 1009.6, 960.2, 943.7, 910.8, 816.0, 774.8, 741.9, 733.6, 696.6 cm<sup>-1</sup>

## 2. Kinetic studies by <sup>1</sup>H-NMR

The photoreaction of *S*-phenyl thioformate (**1b**) was investigated by <sup>1</sup>H-NMR spectroscopy (48.2 mM, CD<sub>3</sub>CN, quartz NMR tube, 200 MHz). **Figure S1** shows in detail the <sup>1</sup>H-NMR spectra of the sample *S*-phenyl thioformate (**1b**) before irradiation (blank) and after several irradiation doses with UV light (254 nm, 5.08 mWcm<sup>-2</sup>). During irradiation, the sample in the quartz NMR tube was stirred at 1000 rpm with a vortex. The distance between the NMR tube and the end of the light guide was 3 cm.

Before irradiation (blank), the singlet corresponding to the H of the thioformate (HCOS-) was found at 10.24 ppm. After one hour of overall irradiation, the formyl signal decreased from 1 to 0.06 H giving a conversion of 94%.

The products of the photoreaction were investigated by HPLC (UV detection at 254 nm; **Figure S2**).

The photoreaction of *S,S'*-(thiobis(4,1-phenylene)) dimethanethioate (**2b**) was investigated by <sup>1</sup>H-NMR spectroscopy (7.72 mM, DMSO-*d*<sub>6</sub>, borosilicate glass NMR tube, 200 MHz). The sample was irradiated at different irradiation doses with visible light (405 nm, 1.55 W cm<sup>-2</sup>). During irradiation, the sample in the borosilicate glass NMR tube was stirred with a vortex (1000-2000 rpm). The distance between the NMR tube and the end of the light guide was 2 cm.

For *S,S'*-(thiobis(4,1-phenylene)) dimethanethioate, a conversion of 42% was found (see **Figure S3**).

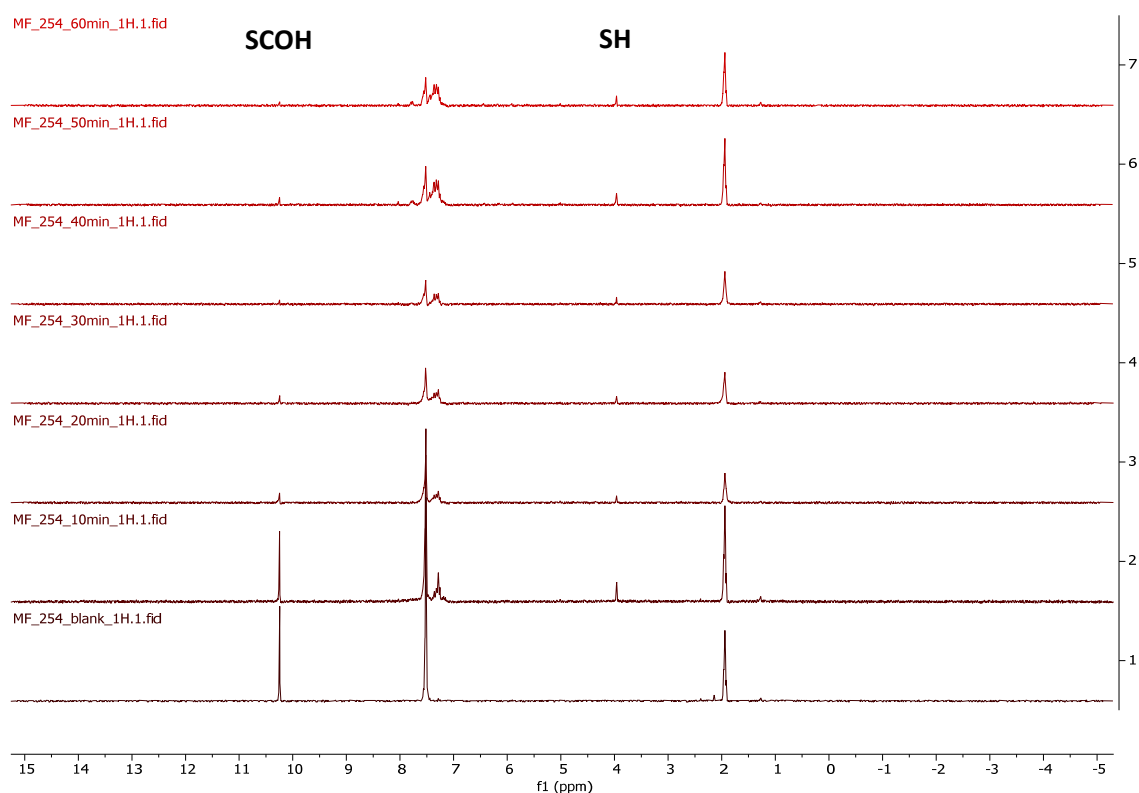

**Figure S1:** Spectra of *S*-phenyl thioformate (**1b**) at different irradiation doses with monochromatic UV light (254 nm).

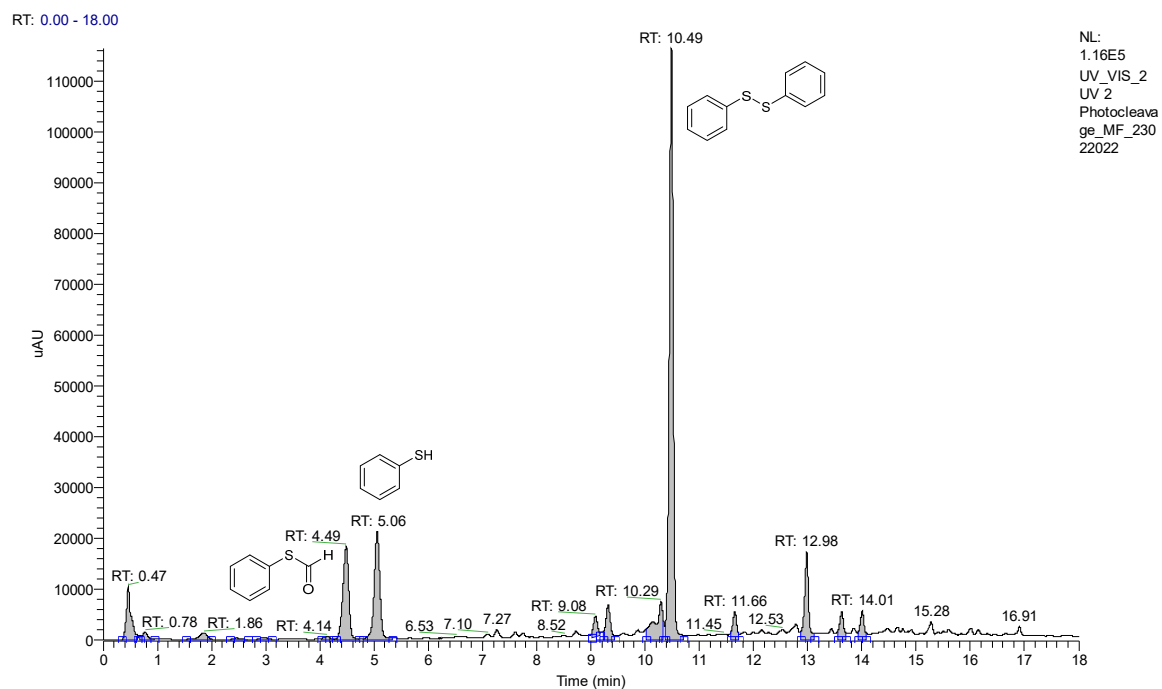

#### PEAK LIST

Photocleavage\_MF\_23022022.RAW

RT: 0.00 - 18.00

Number of detected peaks: 15

| Apex RT | Start RT | End RT | Area       | %Area | Height     | %Height |
|---------|----------|--------|------------|-------|------------|---------|
| 0.47    | 0.36     | 0.63   | 65185.762  | 5.25  | 10616.830  | 4.83    |
| 0.78    | 0.70     | 0.85   | 10357.668  | 0.83  | 1651.390   | 0.75    |
| 1.86    | 1.61     | 1.99   | 17290.260  | 1.39  | 1451.706   | 0.66    |
| 2.96    | 2.82     | 3.09   | 6982.288   | 0.56  | 627.370    | 0.29    |
| 4.14    | 4.01     | 4.21   | 6282.027   | 0.51  | 742.665    | 0.34    |
| 4.49    | 4.27     | 4.62   | 142297.308 | 11.46 | 18452.720  | 8.40    |
| 5.06    | 4.84     | 5.25   | 155466.512 | 12.53 | 21361.660  | 9.73    |
| 9.08    | 8.99     | 9.17   | 30394.682  | 2.45  | 4886.530   | 2.22    |
| 9.32    | 9.21     | 9.41   | 44292.681  | 3.57  | 6997.520   | 3.19    |
| 10.30   | 9.91     | 10.35  | 84358.096  | 6.80  | 7580.623   | 3.45    |
| 10.49   | 10.37    | 10.60  | 535053.215 | 43.11 | 114279.291 | 52.03   |
| 11.66   | 11.61    | 11.77  | 25255.940  | 2.03  | 5233.933   | 2.38    |
| 12.98   | 12.91    | 13.11  | 77267.280  | 6.22  | 16466.147  | 7.50    |
| 13.63   | 13.55    | 13.68  | 22669.556  | 1.83  | 4970.296   | 2.26    |
| 14.01   | 13.92    | 14.08  | 18089.367  | 1.46  | 4321.712   | 1.97    |

**Figure S2:** HPCL chromatogram of photocleavage reaction of *S*-phenyl thioformate (**1b**).

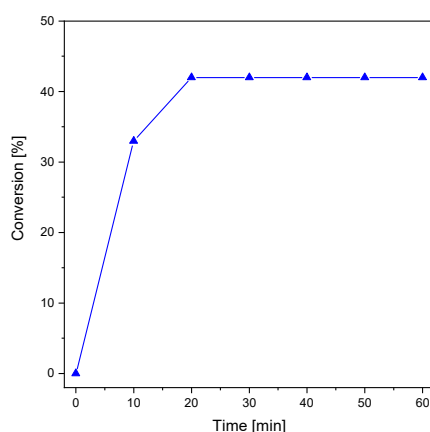

**Figure S3:** Conversion of *S,S'*-(thiobis(4,1-phenylene)) dimethanethioate (**2b**) under visible light (405 nm, 1.55 W cm<sup>-2</sup>).

### 3. UV-vis absorption behaviour

The UV-Vis absorption behaviour of the investigated compounds was measured at different concentrations in acetonitrile and in DMSO.

Firstly, a comparison of the maximum absorption of *S*-phenyl thioformate (**1b**), thiophenol and diphenyl disulfide was carried out at 0.001 M in acetonitrile. As shown in the **Figure S4**, thiophenol presents the higher absorption, followed by *S*-phenyl thioformate (**1b**) and diphenyl disulfide.

Then, the absorption of 4,4'-thiolbisbenzenethiol (**2a**) and *S,S'*-(thiobis(4,1-phenylene)) dimethanethioate (**2b**) was studied in detail at different concentrations in DMSO **Figure S5**, found it again that the absorption of the thiol derivative (> 350 nm) is higher than the formyl derivative (< 350 nm).

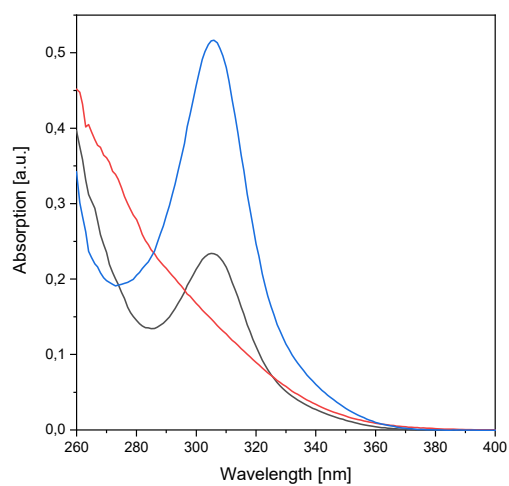

**Figure S4:** UV spectra of *S*-phenyl thioformate (black line), thiophenol (blue line) and diphenyl disulfide (red line).

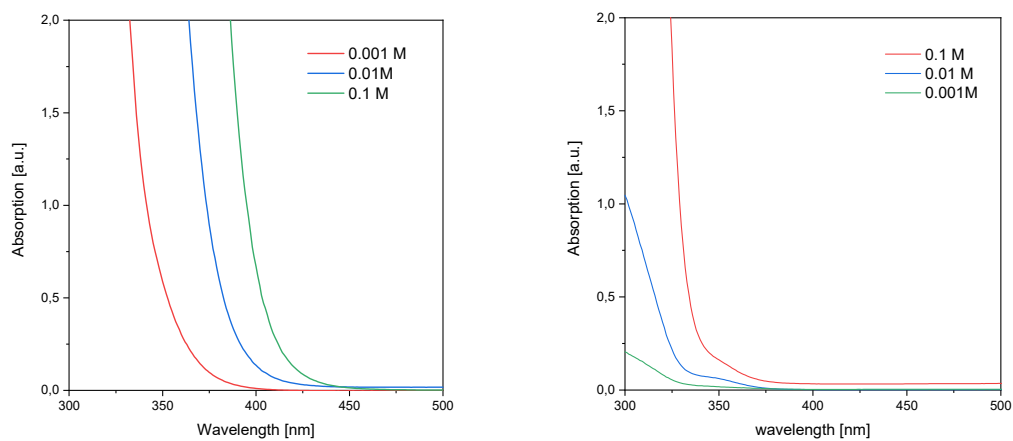

**Figure S5:** UV-Vis spectra of **2a** (left) and **2b** (right)

## 4. Further photodecarbonylation studies

### 4.1. Carbon monoxide (CO) detection by GC-MS

The CO formation was proved by GC-MS, measuring the contained gas in a closed vial, after irradiating *S*-phenyl thioformate (0.1 mL) under Ar atmosphere (**Figure S6**). The sample was irradiated with an OmniCure<sup>®</sup> lamp series 1000 (100 watt Mercury Arc.) for 1 min at 1 cm of distance.

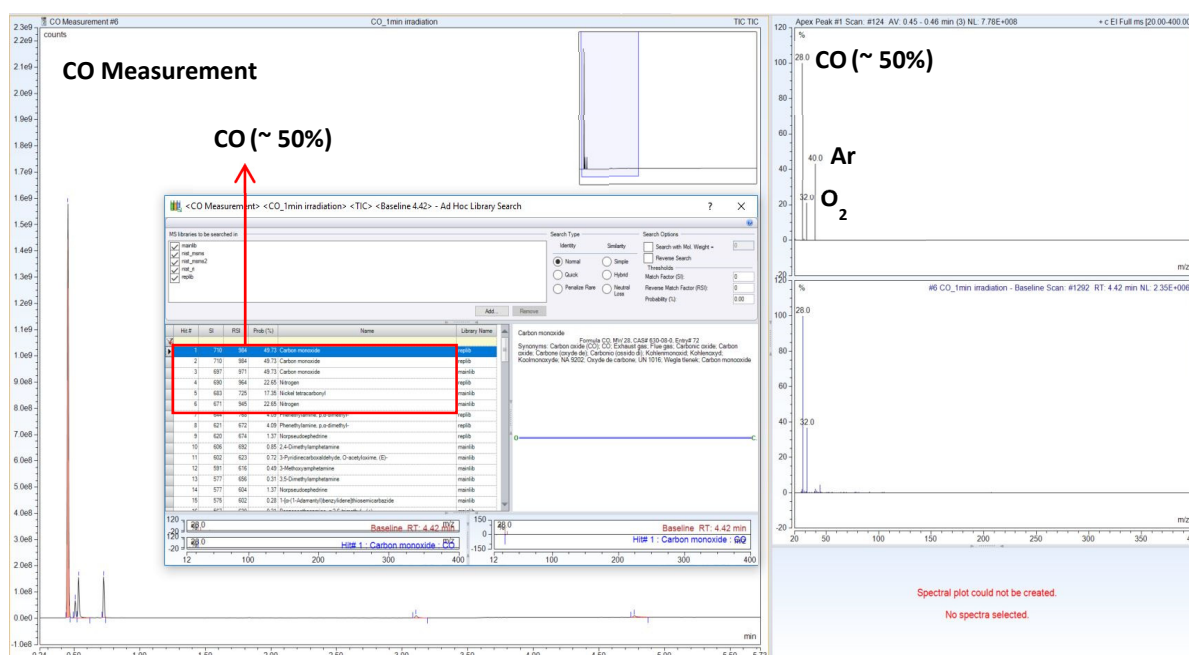

**Figure S6:** Chromatogram and MS spectra of photodecarbonylation reaction (photocleavage of *S*-thioformate with generation of carbon monoxide).



To corroborate this result, measurements of two blanks (vial filled with air and argon) were conducted as it shown in **Figure S7**.

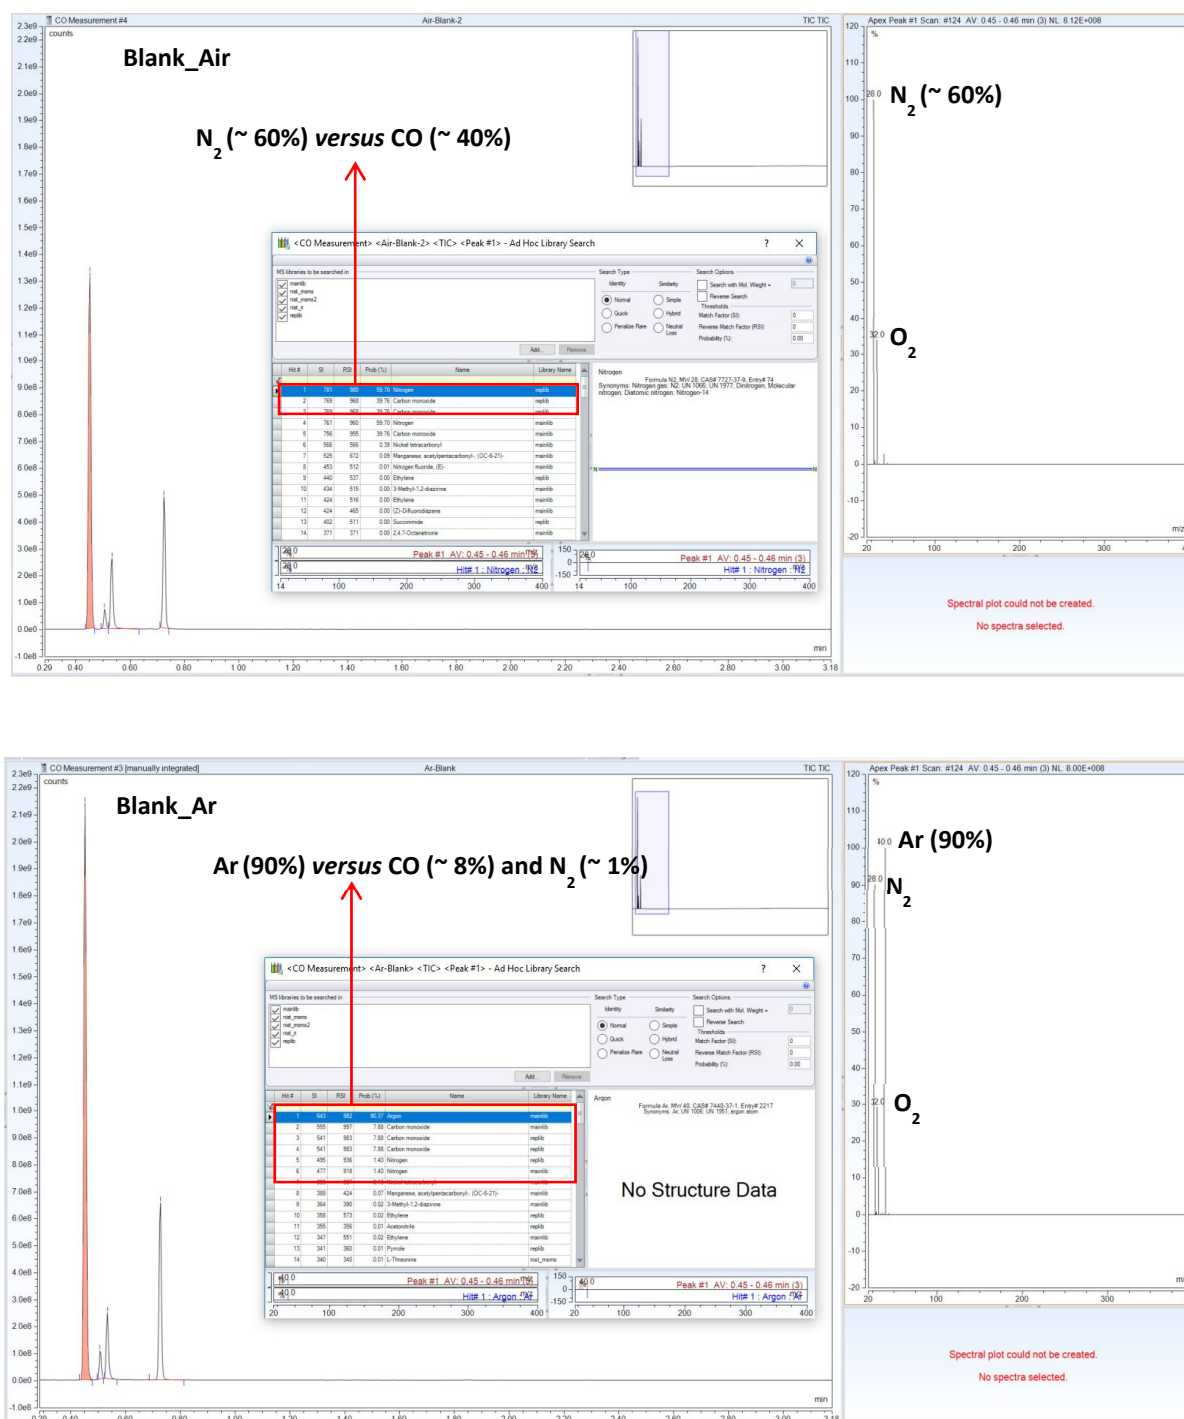

**Figure S7:** Chromatograms and MS spectra of blanks samples. The upper figure corresponds to air measurement and the lower figure to argon measurement.

#### 4.2. Detection of formed radicals by spin-trapping electron paramagnetic resonance (ST-EPR) spectroscopy.

The generation of thiyl ( $\text{PhS}\cdot$ ), formyl ( $\text{CHO}\cdot$ ) and hydrogen ( $\text{H}\cdot$ ) radicals were confirmed by comparison of the hyperfine coupling constants ( $a_{\text{N}}$  and  $a_{\text{H}}$ ) obtained in the simulation with reference data shown in Table S1.<sup>1-3</sup> Figure S8 displays the signal assignments in the spectrum.

**Table S1.** Simulation parameters of the EPR spectra displayed in the paper, together with published reference data.

| Radical     | Relative Intensity (%) | $a_{\text{N}}$ (mT) | $a_{\text{H}}$ (mT) | Reference            |
|-------------|------------------------|---------------------|---------------------|----------------------|
| <b>PhS•</b> | 51                     | 1.36                | 1.47                | This work<br>[31]    |
|             |                        | 1.36                | 1.45                |                      |
| <b>CHO•</b> | 39                     | 1.50                | 2.06                | This work<br>[32,33] |
|             |                        | 1.58                | 2.12                |                      |
| <b>H•</b>   | 10                     | 1.66                | 2.07 (2 H)          | This work<br>[33]    |
|             |                        | 1.61                | 2.25 (2 H)          |                      |

The simulation of the three radical species shows a good agreement with previously published data. Especially the hyperfine couplings for the thiyl radical **PhS•** show an essentially perfect fit. The other two radicals show small deviations. This can be explained by the different solvent used in our experiment.

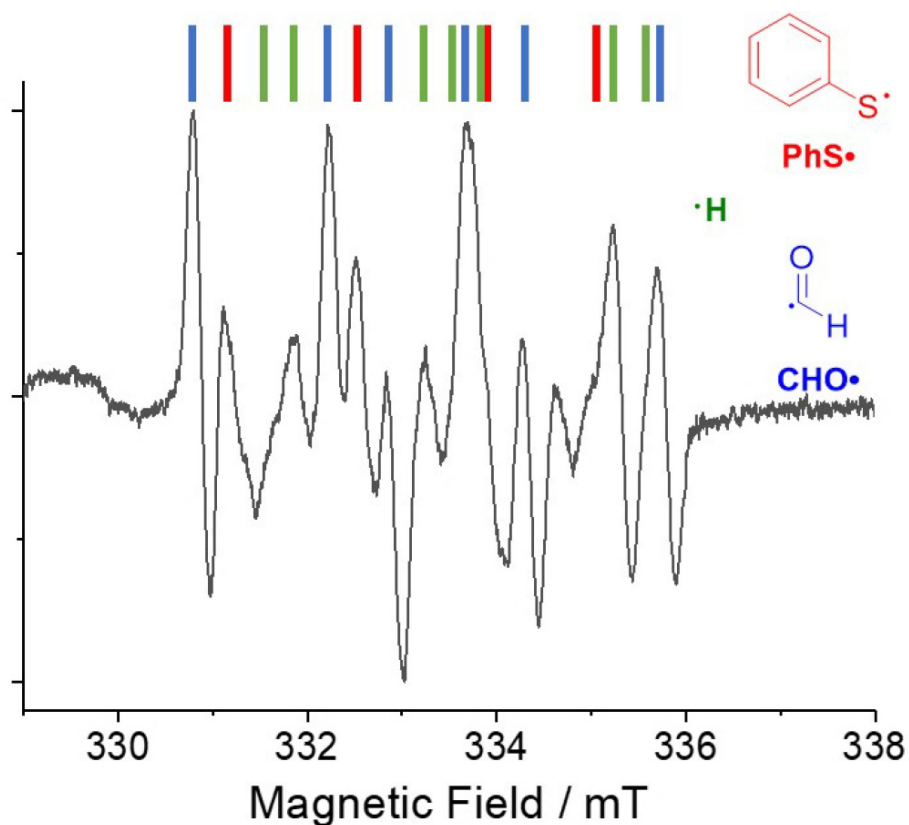

**Figure S8:** Spectrum signal assignment.

## 5. Formulations

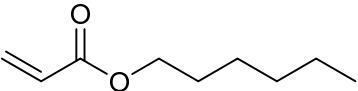
**Hexyl acrylate formulations:** these formulations were prepared using 1 mM of photoinitiator (PI) [**1a**, **1b** and **the corresponding disulfide**] to calculate the double bond conversion (DB conversion) by IR.

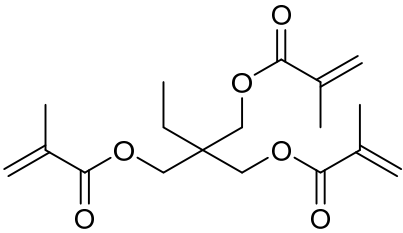
**Trimethylolpropan-trimethacrylate (TMPTMA) formulations:** these formulations were prepared using 1 mM of PI [**2a** (bifunctional thiol) or **2b** (bifunctional *S*-thioformate)] to calculate the DB conversion by IR. For printing, 0.01 wt% Sudan II G (light absorber) and 0.5 wt% pyrogallol (stabilizer) were added to the formulations.

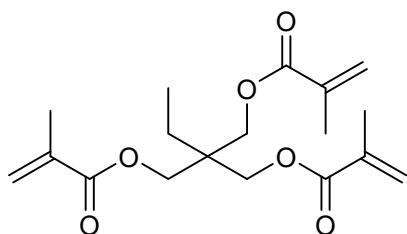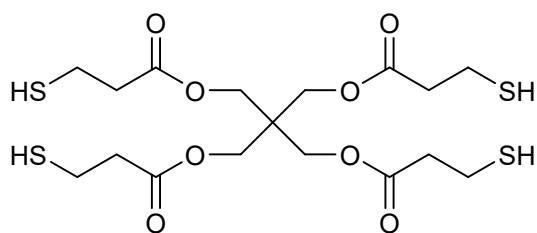

**Trimethylolpropan-trimethacrylate (TMPTMA) and (PETMP) formulations:** these formulations were prepared using 70 mol% TMPTMA [ene] and 30 mol% PETMP [SH] containing 0.5 wt% propyl gallate (radical scavenger) and 1 mM PI [**2a** (bifunctional thiol) or **2b** (bifunctional *S*-thioformate)], both to calculate the DB conversion by IR and to show their stability by rheological measurements.

## 6. Appendix of $^1\text{H}$ - and $^{13}\text{C}$ -NMR spectra

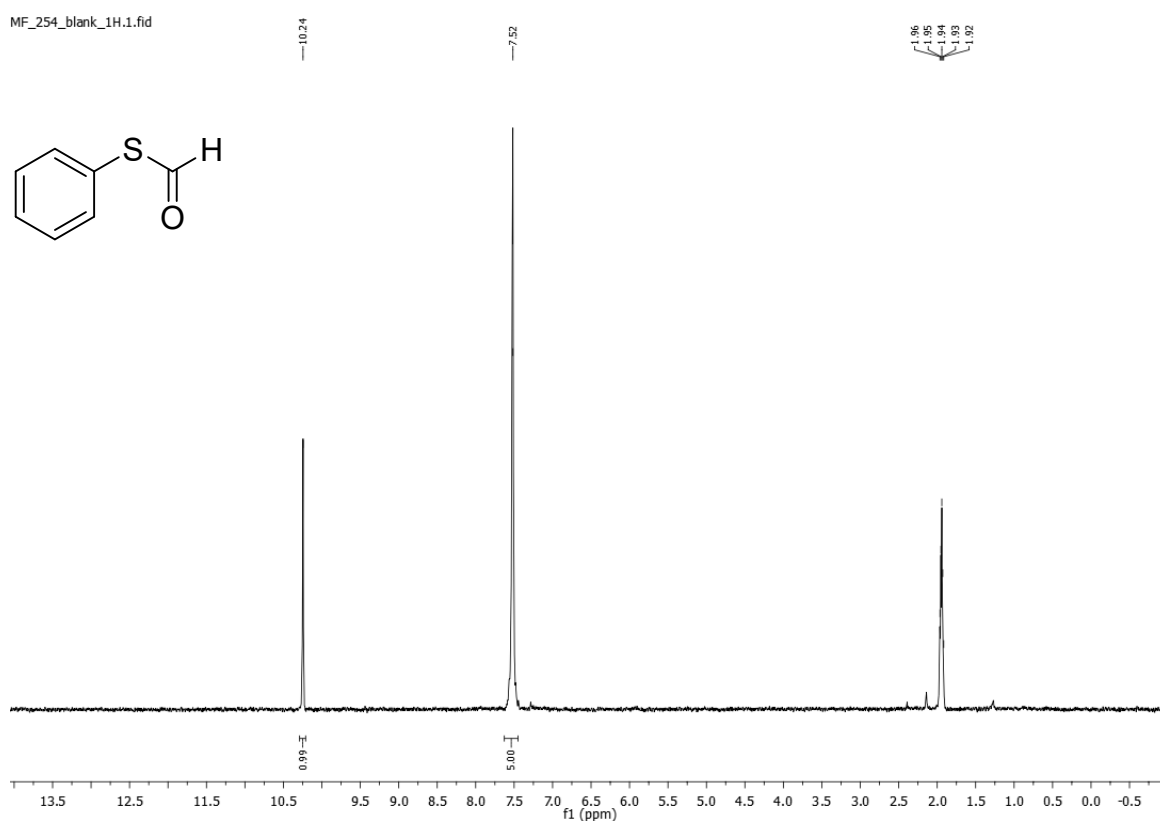

**Figure S9:**  $^1\text{H}$ -NMR (200 MHz,  $\text{CD}_3\text{CN}$ ) of *S*-phenyl thioformate (**1b**)

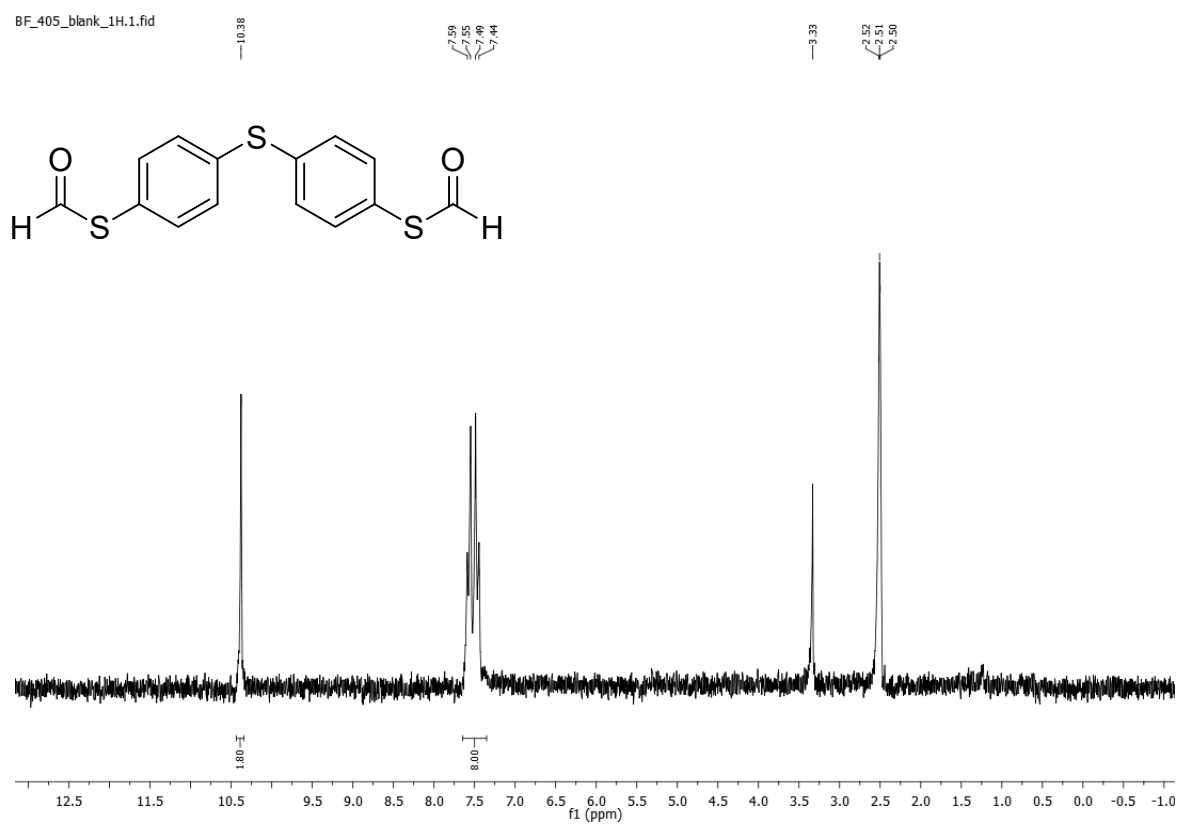

**Figure S10:**  $^1\text{H}$ -NMR (200 MHz,  $\text{DMSO-}d_6$ ) of *S,S'*-(thiobis(4,1-phenylene)) dimethanethioate (**2b**)

BF2\_13C1.fid

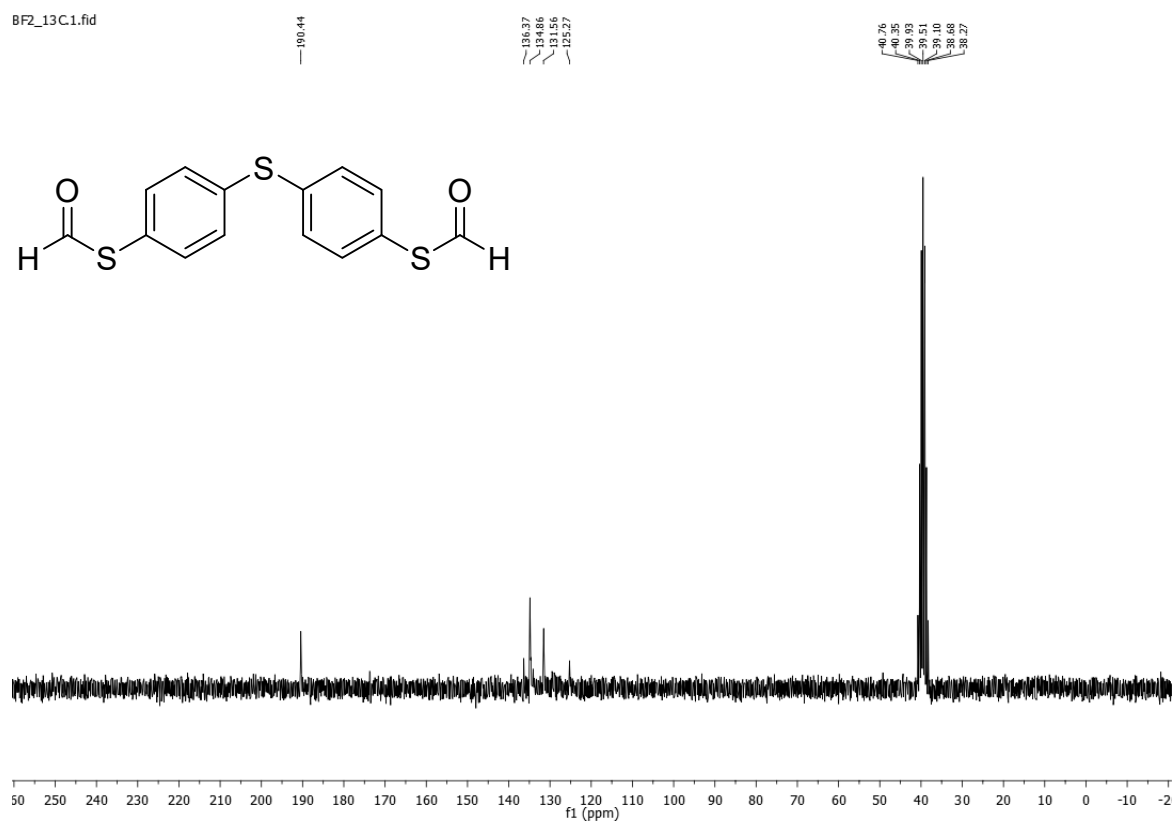

**Figure S11:** <sup>13</sup>C-NMR (50 MHz, DMSO-*d*<sub>6</sub>) of *S,S'*-(thiobis(4,1-phenylene)) dimethanethioate (**2b**)
